# Supplementary material for: Validation, Replication, and Sensitivity Testing of Heckman-Type Selection Models to Adjust Estimates of HIV Prevalence
Source: PLOS journal article supplement (doi:10.1371/journal.pone.0112563), 2014-11-17
Supplement: S2 (10.1371/journal.pone.0112563.s002) [file journal.pone.0112563.s002]

# Agincourt Regression Estimation Results Tables

**Table 1.** Model M1 Estimation Results

| Variable                  | Coefficient         | (Std. Err.) |
|---------------------------|---------------------|-------------|
| Outcome Equation: $[F:I]$ |                     |             |
| age = 20                  | -0.174              | (0.230)     |
| age = 25                  | -0.339              | (0.225)     |
| age = 30                  | -0.303              | (0.216)     |
| age = 35                  | -0.514*             | (0.210)     |
| age = 40                  | -0.551*             | (0.222)     |
| age = 45                  | -0.580**            | (0.219)     |
| age = 50                  | 0.016               | (0.299)     |
| age = 55                  | -0.371              | (0.251)     |
| age = 60                  | -0.276              | (0.263)     |
| age = 65                  | -0.341              | (0.261)     |
| age = 70                  | -0.543*             | (0.274)     |
| age = 75                  | -0.556*             | (0.282)     |
| age = 80                  | -0.289              | (0.317)     |
| sex = 1                   | -0.039              | (0.245)     |
| age = 20 and sex = 1      | -0.041              | (0.313)     |
| age = 25 and sex = 1      | -0.433              | (0.313)     |
| age = 30 and sex = 1      | -0.595 <sup>†</sup> | (0.319)     |
| age = 35 and sex = 1      | -0.317              | (0.301)     |
| age = 40 and sex = 1      | -0.369              | (0.328)     |
| age = 45 and sex = 1      | -0.158              | (0.317)     |
| age = 50 and sex = 1      | -0.966*             | (0.377)     |
| age = 55 and sex = 1      | -0.285              | (0.371)     |
| age = 60 and sex = 1      | -0.222              | (0.354)     |
| age = 65 and sex = 1      | -0.355              | (0.352)     |
| age = 70 and sex = 1      | 0.242               | (0.394)     |
| age = 75 and sex = 1      | 5.229**             | (0.331)     |
| age = 80 and sex = 1      | -0.363              | (0.429)     |
| village = 2               | -0.021              | (0.179)     |
| village = 3               | 0.003               | (0.156)     |
| village = 4               | -0.017              | (0.185)     |
| village = 5               | 0.363 <sup>†</sup>  | (0.191)     |
| village = 6               | -0.140              | (0.182)     |
| village = 7               | -0.173              | (0.216)     |
| village = 8               | 0.109               | (0.169)     |
| village = 9               | -0.249 <sup>†</sup> | (0.147)     |
| village = 10              | 0.444**             | (0.161)     |
| village = 11              | 0.066               | (0.145)     |
| village = 12              | 0.052               | (0.188)     |
| village = 13              | -0.073              | (0.169)     |
| village = 14              | -0.450 <sup>†</sup> | (0.252)     |
| village = 15              | 0.213               | (0.231)     |
| village = 16              | -0.020              | (0.143)     |
| village = 17              | -0.150              | (0.257)     |
| village = 18              | 0.228               | (0.287)     |
| village = 19              | 0.476               | (0.310)     |

*Continued on next page...*

... table 1 continued

| Variable                  | Coefficient         | (Std. Err.) |
|---------------------------|---------------------|-------------|
| village = 20              | -0.043              | (0.254)     |
| village = 21              | 0.081               | (0.305)     |
| migration = 1             | -0.147 <sup>†</sup> | (0.078)     |
| SES quintile = 2          | 0.052               | (0.129)     |
| SES quintile = 3          | -0.176              | (0.124)     |
| SES quintile = 4          | -0.268*             | (0.119)     |
| SES quintile = 5          | -0.290*             | (0.119)     |
| Intercept                 | 2.327**             | (0.241)     |
| Selection Equation: $[F]$ |                     |             |
| age = 20                  | -0.322**            | (0.108)     |
| age = 25                  | -0.351**            | (0.106)     |
| age = 30                  | -0.203 <sup>†</sup> | (0.108)     |
| age = 35                  | 0.000               | (0.110)     |
| age = 40                  | -0.146              | (0.116)     |
| age = 45                  | 0.005               | (0.120)     |
| age = 50                  | 0.145               | (0.149)     |
| age = 55                  | 0.107               | (0.147)     |
| age = 60                  | 0.511**             | (0.171)     |
| age = 65                  | 0.443**             | (0.167)     |
| age = 70                  | 0.376*              | (0.189)     |
| age = 75                  | 0.578**             | (0.221)     |
| age = 80                  | 0.358 <sup>†</sup>  | (0.201)     |
| sex = 1                   | 0.164               | (0.126)     |
| age = 20 and sex = 1      | -0.681**            | (0.154)     |
| age = 25 and sex = 1      | -0.835**            | (0.153)     |
| age = 30 and sex = 1      | -0.999**            | (0.155)     |
| age = 35 and sex = 1      | -0.971**            | (0.156)     |
| age = 40 and sex = 1      | -0.973**            | (0.166)     |
| age = 45 and sex = 1      | -0.994**            | (0.170)     |
| age = 50 and sex = 1      | -0.940**            | (0.203)     |
| age = 55 and sex = 1      | -0.984**            | (0.203)     |
| age = 60 and sex = 1      | -0.895**            | (0.223)     |
| age = 65 and sex = 1      | -0.805**            | (0.227)     |
| age = 70 and sex = 1      | -0.678**            | (0.248)     |
| age = 75 and sex = 1      | -0.713*             | (0.320)     |
| age = 80 and sex = 1      | 0.081               | (0.329)     |
| village = 2               | -0.499**            | (0.112)     |
| village = 3               | -0.047              | (0.098)     |
| village = 4               | -0.028              | (0.116)     |
| village = 5               | -0.166              | (0.114)     |
| village = 6               | 0.111               | (0.115)     |
| village = 7               | -0.168              | (0.133)     |
| village = 8               | -0.138              | (0.099)     |
| village = 9               | -0.301**            | (0.101)     |
| village = 10              | -0.129              | (0.101)     |
| village = 11              | -0.189*             | (0.088)     |
| village = 12              | -0.020              | (0.137)     |
| village = 13              | -0.188              | (0.121)     |
| village = 14              | -0.381*             | (0.152)     |

Continued on next page...

... table 1 continued

| Variable         | Coefficient         | (Std. Err.) |
|------------------|---------------------|-------------|
| village = 15     | 0.049               | (0.110)     |
| village = 16     | 0.117               | (0.115)     |
| village = 17     | -0.189              | (0.141)     |
| village = 18     | -0.286 <sup>†</sup> | (0.169)     |
| village = 19     | 0.223               | (0.180)     |
| village = 20     | -0.049              | (0.177)     |
| village = 21     | -0.040              | (0.154)     |
| migration = 1    | -0.173**            | (0.045)     |
| SES quintile = 2 | 0.043               | (0.071)     |
| SES quintile = 3 | 0.039               | (0.070)     |
| SES quintile = 4 | 0.044               | (0.070)     |
| SES quintile = 5 | -0.058              | (0.070)     |
| Intercept        | 1.139**             | (0.122)     |
| $\rho$           | -0.215              | (0.288)     |

Significance levels :    † : 10%    \* : 5%    \*\* : 1%

**Table 2.** Model M2 Estimation Results

| Variable                    | Coefficient         | (Std. Err.) |
|-----------------------------|---------------------|-------------|
| Outcome Equation: $[F:I:T]$ |                     |             |
| age = 20                    | -0.503*             | (0.230)     |
| age = 25                    | -0.803**            | (0.221)     |
| age = 30                    | -0.605**            | (0.226)     |
| age = 35                    | -0.662**            | (0.225)     |
| age = 40                    | -0.694**            | (0.236)     |
| age = 45                    | -0.406              | (0.256)     |
| age = 50                    | -0.482 <sup>†</sup> | (0.264)     |
| age = 55                    | -0.393              | (0.269)     |
| age = 60                    | -0.581*             | (0.254)     |
| age = 65                    | -0.754**            | (0.246)     |
| age = 70                    | -0.485              | (0.303)     |
| age = 75                    | -0.472              | (0.327)     |
| age = 80                    | -0.416              | (0.330)     |
| sex = 1                     | -0.323              | (0.244)     |
| age = 20 and sex = 1        | 0.095               | (0.304)     |
| age = 25 and sex = 1        | -0.144              | (0.296)     |
| age = 30 and sex = 1        | -0.341              | (0.304)     |
| age = 35 and sex = 1        | -0.154              | (0.296)     |
| age = 40 and sex = 1        | -0.130              | (0.318)     |
| age = 45 and sex = 1        | -0.262              | (0.323)     |
| age = 50 and sex = 1        | -0.289              | (0.363)     |
| age = 55 and sex = 1        | 0.119               | (0.394)     |
| age = 60 and sex = 1        | 0.199               | (0.342)     |
| age = 65 and sex = 1        | 0.899*              | (0.420)     |
| age = 70 and sex = 1        | 0.544               | (0.420)     |
| age = 75 and sex = 1        | 0.169               | (0.470)     |
| age = 80 and sex = 1        | 0.281               | (0.484)     |
| village = 2                 | -0.202              | (0.217)     |
| village = 3                 | -0.048              | (0.168)     |
| village = 4                 | -0.377 <sup>†</sup> | (0.196)     |
| village = 5                 | -0.056              | (0.183)     |
| village = 6                 | -0.253              | (0.184)     |
| village = 7                 | 0.362               | (0.225)     |
| village = 8                 | -0.018              | (0.155)     |
| village = 9                 | -0.375*             | (0.178)     |
| village = 10                | 0.224               | (0.175)     |
| village = 11                | 0.100               | (0.153)     |
| village = 12                | 0.593**             | (0.226)     |
| village = 13                | -0.089              | (0.179)     |
| village = 14                | 0.476               | (0.293)     |
| village = 15                | 0.165               | (0.221)     |
| village = 16                | -0.249              | (0.175)     |
| village = 17                | 0.033               | (0.245)     |
| village = 18                | 0.048               | (0.267)     |
| village = 19                | -0.008              | (0.285)     |
| village = 20                | 0.151               | (0.327)     |
| village = 21                | 0.106               | (0.213)     |

*Continued on next page...*

... table 2 continued

| Variable                    | Coefficient         | (Std. Err.) |
|-----------------------------|---------------------|-------------|
| migration = 1               | -0.017              | (0.083)     |
| SES quintile = 2            | -0.036              | (0.119)     |
| SES quintile = 3            | -0.156              | (0.119)     |
| SES quintile = 4            | -0.414**            | (0.118)     |
| SES quintile = 5            | -0.494**            | (0.117)     |
| Intercept                   | 2.430**             | (0.274)     |
| Selection Equation: $[F:I]$ |                     |             |
| age = 20                    | -0.201              | (0.232)     |
| age = 25                    | -0.380 <sup>†</sup> | (0.225)     |
| age = 30                    | -0.321              | (0.218)     |
| age = 35                    | -0.527*             | (0.213)     |
| age = 40                    | -0.569*             | (0.224)     |
| age = 45                    | -0.589**            | (0.222)     |
| age = 50                    | 0.026               | (0.302)     |
| age = 55                    | -0.367              | (0.253)     |
| age = 60                    | -0.257              | (0.261)     |
| age = 65                    | -0.326              | (0.262)     |
| age = 70                    | -0.526 <sup>†</sup> | (0.275)     |
| age = 75                    | -0.532 <sup>†</sup> | (0.284)     |
| age = 80                    | -0.268              | (0.320)     |
| sex = 1                     | -0.029              | (0.249)     |
| age = 20 and sex = 1        | -0.118              | (0.318)     |
| age = 25 and sex = 1        | -0.524 <sup>†</sup> | (0.300)     |
| age = 30 and sex = 1        | -0.707*             | (0.293)     |
| age = 35 and sex = 1        | -0.407              | (0.287)     |
| age = 40 and sex = 1        | -0.478              | (0.307)     |
| age = 45 and sex = 1        | -0.253              | (0.304)     |
| age = 50 and sex = 1        | -1.061**            | (0.375)     |
| age = 55 and sex = 1        | -0.381              | (0.360)     |
| age = 60 and sex = 1        | -0.264              | (0.353)     |
| age = 65 and sex = 1        | -0.403              | (0.352)     |
| age = 70 and sex = 1        | 0.205               | (0.398)     |
| age = 75 and sex = 1        | 11.429              | (0.000)     |
| age = 80 and sex = 1        | -0.368              | (0.433)     |
| village = 2                 | -0.079              | (0.177)     |
| village = 3                 | -0.003              | (0.157)     |
| village = 4                 | -0.038              | (0.188)     |
| village = 5                 | 0.357 <sup>†</sup>  | (0.193)     |
| village = 6                 | -0.136              | (0.182)     |
| village = 7                 | -0.188              | (0.215)     |
| village = 8                 | 0.103               | (0.171)     |
| village = 9                 | -0.280*             | (0.142)     |
| village = 10                | 0.442**             | (0.162)     |
| village = 11                | 0.053               | (0.144)     |
| village = 12                | 0.053               | (0.190)     |
| village = 13                | -0.088              | (0.170)     |
| village = 14                | -0.493*             | (0.233)     |
| village = 15                | 0.224               | (0.235)     |
| village = 16                | -0.020              | (0.144)     |

Continued on next page...

... table 2 continued

| Variable                                                  | Coefficient | (Std. Err.) |
|-----------------------------------------------------------|-------------|-------------|
| village = 17                                              | -0.169      | (0.262)     |
| village = 18                                              | 0.211       | (0.290)     |
| village = 19                                              | 0.489       | (0.308)     |
| village = 20                                              | -0.045      | (0.258)     |
| village = 21                                              | 0.088       | (0.311)     |
| migration = 1                                             | -0.162*     | (0.075)     |
| SES quintile = 2                                          | 0.058       | (0.131)     |
| SES quintile = 3                                          | -0.174      | (0.125)     |
| SES quintile = 4                                          | -0.272*     | (0.120)     |
| SES quintile = 5                                          | -0.296*     | (0.119)     |
| Intercept                                                 | 2.301**     | (0.241)     |
| $\rho$                                                    | 0.414       | (0.230)     |
| Significance levels :    † : 10%      * : 5%      ** : 1% |             |             |

**Table 3.** Model M3 Estimation Results

| Variable                | Coefficient         | (Std. Err.) |
|-------------------------|---------------------|-------------|
| Outcome Equation: $[H]$ |                     |             |
| age = 20                | 1.025**             | (0.153)     |
| age = 25                | 1.391**             | (0.152)     |
| age = 30                | 1.422**             | (0.150)     |
| age = 35                | 1.521**             | (0.149)     |
| age = 40                | 1.257**             | (0.158)     |
| age = 45                | 1.222**             | (0.159)     |
| age = 50                | 1.039**             | (0.176)     |
| age = 55                | 1.018**             | (0.175)     |
| age = 60                | 0.567**             | (0.188)     |
| age = 65                | 0.447*              | (0.207)     |
| age = 70                | 0.388 <sup>†</sup>  | (0.219)     |
| age = 75                | 0.064               | (0.254)     |
| age = 80                | -0.614              | (0.405)     |
| sex = 1                 | -0.991**            | (0.334)     |
| age = 20 and sex = 1    | 0.078               | (0.362)     |
| age = 25 and sex = 1    | 0.595 <sup>†</sup>  | (0.361)     |
| age = 30 and sex = 1    | 1.082**             | (0.351)     |
| age = 35 and sex = 1    | 1.073**             | (0.349)     |
| age = 40 and sex = 1    | 1.206**             | (0.361)     |
| age = 45 and sex = 1    | 0.932*              | (0.366)     |
| age = 50 and sex = 1    | 1.164**             | (0.383)     |
| age = 55 and sex = 1    | 1.237**             | (0.377)     |
| age = 60 and sex = 1    | 1.267**             | (0.383)     |
| age = 65 and sex = 1    | 1.187**             | (0.414)     |
| age = 70 and sex = 1    | 0.686               | (0.433)     |
| age = 75 and sex = 1    | 0.973 <sup>†</sup>  | (0.515)     |
| age = 80 and sex = 1    | 1.140 <sup>†</sup>  | (0.643)     |
| village = 2             | 0.178               | (0.183)     |
| village = 3             | 0.114               | (0.121)     |
| village = 4             | -0.012              | (0.152)     |
| village = 5             | -0.114              | (0.135)     |
| village = 6             | 0.056               | (0.144)     |
| village = 7             | -0.095              | (0.155)     |
| village = 8             | -0.082              | (0.125)     |
| village = 9             | -0.057              | (0.131)     |
| village = 10            | -0.217 <sup>†</sup> | (0.121)     |
| village = 11            | 0.047               | (0.113)     |
| village = 12            | 0.073               | (0.157)     |
| village = 13            | 0.001               | (0.141)     |
| village = 14            | -0.025              | (0.179)     |
| village = 15            | 0.034               | (0.141)     |
| village = 16            | -0.329*             | (0.146)     |
| village = 17            | 0.129               | (0.154)     |
| village = 18            | 0.226               | (0.197)     |
| village = 19            | 0.195               | (0.212)     |
| village = 20            | -0.268              | (0.217)     |
| village = 21            | 0.664**             | (0.193)     |

*Continued on next page...*

... table 3 continued

| Variable                      | Coefficient         | (Std. Err.) |
|-------------------------------|---------------------|-------------|
| migration = 1                 | -0.024              | (0.058)     |
| SES quintile = 2              | -0.160*             | (0.081)     |
| SES quintile = 3              | -0.070              | (0.085)     |
| SES quintile = 4              | -0.070              | (0.098)     |
| SES quintile = 5              | -0.351**            | (0.110)     |
| Intercept                     | -1.433**            | (0.180)     |
| Selection Equation: $[F:I:T]$ |                     |             |
| age = 20                      | -0.555*             | (0.241)     |
| age = 25                      | -0.832**            | (0.225)     |
| age = 30                      | -0.663**            | (0.231)     |
| age = 35                      | -0.721**            | (0.232)     |
| age = 40                      | -0.753**            | (0.246)     |
| age = 45                      | -0.422              | (0.257)     |
| age = 50                      | -0.569*             | (0.270)     |
| age = 55                      | -0.456 <sup>†</sup> | (0.276)     |
| age = 60                      | -0.658*             | (0.261)     |
| age = 65                      | -0.817**            | (0.254)     |
| age = 70                      | -0.567 <sup>†</sup> | (0.313)     |
| age = 75                      | -0.536              | (0.341)     |
| age = 80                      | -0.466              | (0.335)     |
| sex = 1                       | -0.377              | (0.251)     |
| age = 20 and sex = 1          | 0.127               | (0.313)     |
| age = 25 and sex = 1          | -0.031              | (0.299)     |
| age = 30 and sex = 1          | -0.236              | (0.309)     |
| age = 35 and sex = 1          | -0.027              | (0.301)     |
| age = 40 and sex = 1          | 0.002               | (0.327)     |
| age = 45 and sex = 1          | -0.185              | (0.332)     |
| age = 50 and sex = 1          | -0.122              | (0.357)     |
| age = 55 and sex = 1          | 0.223               | (0.414)     |
| age = 60 and sex = 1          | 0.264               | (0.353)     |
| age = 65 and sex = 1          | 0.976*              | (0.442)     |
| age = 70 and sex = 1          | 0.689               | (0.434)     |
| age = 75 and sex = 1          | 0.175               | (0.482)     |
| age = 80 and sex = 1          | 0.332               | (0.502)     |
| village = 2                   | -0.081              | (0.228)     |
| village = 3                   | -0.037              | (0.173)     |
| village = 4                   | -0.403*             | (0.199)     |
| village = 5                   | -0.076              | (0.185)     |
| village = 6                   | -0.239              | (0.191)     |
| village = 7                   | 0.413 <sup>†</sup>  | (0.232)     |
| village = 8                   | -0.028              | (0.159)     |
| village = 9                   | -0.358*             | (0.182)     |
| village = 10                  | 0.219               | (0.179)     |
| village = 11                  | 0.081               | (0.161)     |
| village = 12                  | 0.612**             | (0.236)     |
| village = 13                  | -0.097              | (0.183)     |
| village = 14                  | 0.502 <sup>†</sup>  | (0.294)     |
| village = 15                  | 0.153               | (0.225)     |
| village = 16                  | -0.234              | (0.178)     |

Continued on next page...



... table 3 continued

| Variable           | Coefficient         | (Std. Err.) |
|--------------------|---------------------|-------------|
| village = 17       | 0.012               | (0.250)     |
| village = 18       | 0.091               | (0.286)     |
| village = 19       | -0.039              | (0.285)     |
| village = 20       | 0.179               | (0.338)     |
| village = 21       | 0.123               | (0.222)     |
| migration = 1      | 0.015               | (0.079)     |
| SES quintile = 2   | -0.008              | (0.122)     |
| SES quintile = 3   | -0.069              | (0.121)     |
| SES quintile = 4   | -0.348**            | (0.124)     |
| SES quintile = 5   | -0.425**            | (0.118)     |
| fieldworker = 3713 | -0.123              | (0.168)     |
| fieldworker = 3858 | -0.239              | (0.167)     |
| fieldworker = 4680 | 0.289               | (0.227)     |
| fieldworker = 5681 | 0.118               | (0.159)     |
| fieldworker = 6547 | 0.463*              | (0.180)     |
| fieldworker = 6761 | 0.019               | (0.164)     |
| fieldworker = 6963 | -0.286 <sup>†</sup> | (0.156)     |
| fieldworker = 7683 | -0.287              | (0.191)     |
| fieldworker = 8875 | -0.295 <sup>†</sup> | (0.166)     |
| fieldworker = 9821 | 0.160               | (0.165)     |
| Intercept          | 2.547**             | (0.299)     |
| $\rho$             | -0.499              | (0.359)     |

Significance levels :    <sup>†</sup> : 10%      \* : 5%      \*\* : 1%

**Table 4.** Consent Model Estimation Results

| Variable                | Coefficient         | (Std. Err.) |
|-------------------------|---------------------|-------------|
| Outcome Equation: $[H]$ |                     |             |
| age = 20                | 1.024**             | (0.154)     |
| age = 25                | 1.388**             | (0.155)     |
| age = 30                | 1.423**             | (0.151)     |
| age = 35                | 1.534**             | (0.150)     |
| age = 40                | 1.269**             | (0.162)     |
| age = 45                | 1.249**             | (0.160)     |
| age = 50                | 1.031**             | (0.177)     |
| age = 55                | 1.028**             | (0.175)     |
| age = 60                | 0.554**             | (0.190)     |
| age = 65                | 0.429*              | (0.213)     |
| age = 70                | 0.396 <sup>†</sup>  | (0.226)     |
| age = 75                | 0.079               | (0.264)     |
| age = 80                | -0.622              | (0.414)     |
| sex = 1                 | -1.027**            | (0.351)     |
| age = 20 and sex = 1    | 0.098               | (0.376)     |
| age = 25 and sex = 1    | 0.631 <sup>†</sup>  | (0.380)     |
| age = 30 and sex = 1    | 1.139**             | (0.371)     |
| age = 35 and sex = 1    | 1.116**             | (0.363)     |
| age = 40 and sex = 1    | 1.270**             | (0.376)     |
| age = 45 and sex = 1    | 0.958*              | (0.380)     |
| age = 50 and sex = 1    | 1.237**             | (0.404)     |
| age = 55 and sex = 1    | 1.292**             | (0.389)     |
| age = 60 and sex = 1    | 1.319**             | (0.395)     |
| age = 65 and sex = 1    | 1.288**             | (0.417)     |
| age = 70 and sex = 1    | 0.720               | (0.449)     |
| age = 75 and sex = 1    | 0.949 <sup>†</sup>  | (0.534)     |
| age = 80 and sex = 1    | 1.202 <sup>†</sup>  | (0.654)     |
| village = 2             | 0.172               | (0.185)     |
| village = 3             | 0.114               | (0.122)     |
| village = 4             | -0.035              | (0.154)     |
| village = 5             | -0.136              | (0.136)     |
| village = 6             | 0.049               | (0.146)     |
| village = 7             | -0.065              | (0.152)     |
| village = 8             | -0.091              | (0.126)     |
| village = 9             | -0.058              | (0.142)     |
| village = 10            | -0.231 <sup>†</sup> | (0.129)     |
| village = 11            | 0.050               | (0.115)     |
| village = 12            | 0.088               | (0.158)     |
| village = 13            | -0.002              | (0.142)     |
| village = 14            | 0.040               | (0.176)     |
| village = 15            | 0.029               | (0.146)     |
| village = 16            | -0.350*             | (0.147)     |
| village = 17            | 0.141               | (0.155)     |
| village = 18            | 0.218               | (0.200)     |
| village = 19            | 0.180               | (0.216)     |
| village = 20            | -0.262              | (0.217)     |
| village = 21            | 0.668**             | (0.199)     |

*Continued on next page...*

... table 4 continued

| Variable                      | Coefficient         | (Std. Err.) |
|-------------------------------|---------------------|-------------|
| migration = 1                 | -0.014              | (0.059)     |
| SES quintile = 2              | -0.164*             | (0.082)     |
| SES quintile = 3              | -0.066              | (0.088)     |
| SES quintile = 4              | -0.074              | (0.112)     |
| SES quintile = 5              | -0.359**            | (0.131)     |
| Intercept                     | -1.430**            | (0.183)     |
| Selection Equation: $[CT:CS]$ |                     |             |
| age = 20                      | -0.416*             | (0.185)     |
| age = 25                      | -0.676**            | (0.178)     |
| age = 30                      | -0.522**            | (0.177)     |
| age = 35                      | -0.672**            | (0.178)     |
| age = 40                      | -0.702**            | (0.185)     |
| age = 45                      | -0.566**            | (0.188)     |
| age = 50                      | -0.334              | (0.220)     |
| age = 55                      | -0.428*             | (0.209)     |
| age = 60                      | -0.505*             | (0.207)     |
| age = 65                      | -0.669**            | (0.204)     |
| age = 70                      | -0.585*             | (0.231)     |
| age = 75                      | -0.574*             | (0.244)     |
| age = 80                      | -0.403              | (0.261)     |
| sex = 1                       | -0.241              | (0.197)     |
| age = 20 and sex = 1          | 0.027               | (0.250)     |
| age = 25 and sex = 1          | -0.297              | (0.240)     |
| age = 30 and sex = 1          | -0.540*             | (0.239)     |
| age = 35 and sex = 1          | -0.235              | (0.234)     |
| age = 40 and sex = 1          | -0.316              | (0.252)     |
| age = 45 and sex = 1          | -0.210              | (0.252)     |
| age = 50 and sex = 1          | -0.609*             | (0.287)     |
| age = 55 and sex = 1          | -0.089              | (0.304)     |
| age = 60 and sex = 1          | 0.008               | (0.278)     |
| age = 65 and sex = 1          | 0.301               | (0.292)     |
| age = 70 and sex = 1          | 0.504               | (0.327)     |
| age = 75 and sex = 1          | 0.420               | (0.405)     |
| age = 80 and sex = 1          | -0.010              | (0.363)     |
| village = 2                   | -0.097              | (0.168)     |
| village = 3                   | -0.014              | (0.134)     |
| village = 4                   | -0.274 <sup>†</sup> | (0.160)     |
| village = 5                   | 0.116               | (0.150)     |
| village = 6                   | -0.226              | (0.152)     |
| village = 7                   | 0.065               | (0.187)     |
| village = 8                   | 0.019               | (0.134)     |
| village = 9                   | -0.361**            | (0.133)     |
| village = 10                  | 0.357**             | (0.138)     |
| village = 11                  | 0.074               | (0.122)     |
| village = 12                  | 0.276               | (0.174)     |
| village = 13                  | -0.078              | (0.143)     |
| village = 14                  | -0.188              | (0.215)     |
| village = 15                  | 0.210               | (0.182)     |
| village = 16                  | -0.161              | (0.135)     |

Continued on next page...

... table 4 continued

| Variable                                                          | Coefficient         | (Std. Err.) |
|-------------------------------------------------------------------|---------------------|-------------|
| village = 17                                                      | -0.080              | (0.215)     |
| village = 18                                                      | 0.161               | (0.237)     |
| village = 19                                                      | 0.193               | (0.238)     |
| village = 20                                                      | 0.070               | (0.235)     |
| village = 21                                                      | 0.139               | (0.231)     |
| migration = 1                                                     | -0.076              | (0.063)     |
| SES quintile = 2                                                  | 0.027               | (0.102)     |
| SES quintile = 3                                                  | -0.147              | (0.102)     |
| SES quintile = 4                                                  | -0.359**            | (0.100)     |
| SES quintile = 5                                                  | -0.435**            | (0.097)     |
| fieldworker = 3713                                                | -0.201              | (0.147)     |
| fieldworker = 3858                                                | -0.266 <sup>†</sup> | (0.146)     |
| fieldworker = 4680                                                | 0.008               | (0.184)     |
| fieldworker = 5681                                                | 0.044               | (0.136)     |
| fieldworker = 6547                                                | -0.085              | (0.158)     |
| fieldworker = 6761                                                | -0.385**            | (0.142)     |
| fieldworker = 6963                                                | -0.207              | (0.136)     |
| fieldworker = 7683                                                | -0.306 <sup>†</sup> | (0.161)     |
| fieldworker = 8875                                                | -0.273 <sup>†</sup> | (0.141)     |
| fieldworker = 9821                                                | -0.108              | (0.142)     |
| Intercept                                                         | 2.295**             | (0.231)     |
| $\rho$                                                            | -0.342              | (0.436)     |
| Significance levels : <sup>†</sup> : 10%      * : 5%      ** : 1% |                     |             |

**Table 5.** Contact Model Estimation Results

| Variable                | Coefficient        | (Std. Err.) |
|-------------------------|--------------------|-------------|
| Outcome Equation: $[H]$ |                    |             |
| age = 20                | 0.886**            | (0.137)     |
| age = 25                | 1.198**            | (0.137)     |
| age = 30                | 1.246**            | (0.135)     |
| age = 35                | 1.386**            | (0.131)     |
| age = 40                | 1.157**            | (0.140)     |
| age = 45                | 1.114**            | (0.138)     |
| age = 50                | 0.901**            | (0.156)     |
| age = 55                | 0.914**            | (0.153)     |
| age = 60                | 0.583**            | (0.158)     |
| age = 65                | 0.570**            | (0.160)     |
| age = 70                | 0.511**            | (0.181)     |
| age = 75                | 0.324              | (0.198)     |
| age = 80                | -0.098             | (0.235)     |
| sex = 1                 | -0.179             | (0.166)     |
| age = 20 and sex = 1    | -0.430*            | (0.210)     |
| age = 25 and sex = 1    | 0.031              | (0.211)     |
| age = 30 and sex = 1    | 0.368 <sup>†</sup> | (0.215)     |
| age = 35 and sex = 1    | 0.265              | (0.210)     |
| age = 40 and sex = 1    | 0.432 <sup>†</sup> | (0.228)     |
| age = 45 and sex = 1    | 0.196              | (0.220)     |
| age = 50 and sex = 1    | 0.532*             | (0.246)     |
| age = 55 and sex = 1    | 0.368              | (0.246)     |
| age = 60 and sex = 1    | 0.406 <sup>†</sup> | (0.235)     |
| age = 65 and sex = 1    | 0.285              | (0.243)     |
| age = 70 and sex = 1    | -0.129             | (0.275)     |
| age = 75 and sex = 1    | 0.021              | (0.342)     |
| age = 80 and sex = 1    | 0.483              | (0.334)     |
| village = 2             | 0.167              | (0.148)     |
| village = 3             | 0.124              | (0.107)     |
| village = 4             | 0.125              | (0.133)     |
| village = 5             | -0.109             | (0.116)     |
| village = 6             | 0.148              | (0.128)     |
| village = 7             | -0.047             | (0.144)     |
| village = 8             | -0.070             | (0.108)     |
| village = 9             | 0.145              | (0.112)     |
| village = 10            | -0.281**           | (0.105)     |
| village = 11            | 0.007              | (0.098)     |
| village = 12            | -0.013             | (0.131)     |
| village = 13            | 0.046              | (0.119)     |
| village = 14            | 0.118              | (0.174)     |
| village = 15            | 0.003              | (0.131)     |
| village = 16            | -0.115             | (0.119)     |
| village = 17            | 0.146              | (0.143)     |
| village = 18            | 0.097              | (0.171)     |
| village = 19            | 0.104              | (0.181)     |
| village = 20            | -0.184             | (0.183)     |
| village = 21            | 0.521**            | (0.176)     |

*Continued on next page...*

... table 5 continued

| Variable                                              | Coefficient | (Std. Err.) |
|-------------------------------------------------------|-------------|-------------|
| Intercept                                             | -1.428**    | (0.142)     |
| Selection Equation: $[CT]$                            |             |             |
| age = 20                                              | -0.301**    | (0.108)     |
| age = 25                                              | -0.353**    | (0.107)     |
| age = 30                                              | -0.257*     | (0.108)     |
| age = 35                                              | -0.031      | (0.110)     |
| age = 40                                              | -0.161      | (0.116)     |
| age = 45                                              | 0.031       | (0.121)     |
| age = 50                                              | 0.229       | (0.152)     |
| age = 55                                              | 0.174       | (0.149)     |
| age = 60                                              | 0.595**     | (0.170)     |
| age = 65                                              | 0.498**     | (0.173)     |
| age = 70                                              | 0.425*      | (0.198)     |
| age = 75                                              | 0.642**     | (0.223)     |
| age = 80                                              | 0.394*      | (0.201)     |
| sex = 1                                               | 0.183       | (0.127)     |
| age = 20 and sex = 1                                  | -0.672**    | (0.155)     |
| age = 25 and sex = 1                                  | -0.810**    | (0.154)     |
| age = 30 and sex = 1                                  | -0.934**    | (0.155)     |
| age = 35 and sex = 1                                  | -0.932**    | (0.156)     |
| age = 40 and sex = 1                                  | -0.967**    | (0.166)     |
| age = 45 and sex = 1                                  | -0.973**    | (0.169)     |
| age = 50 and sex = 1                                  | -1.008**    | (0.206)     |
| age = 55 and sex = 1                                  | -0.963**    | (0.204)     |
| age = 60 and sex = 1                                  | -0.937**    | (0.222)     |
| age = 65 and sex = 1                                  | -0.796**    | (0.231)     |
| age = 70 and sex = 1                                  | -0.702**    | (0.257)     |
| age = 75 and sex = 1                                  | -0.817*     | (0.320)     |
| age = 80 and sex = 1                                  | 0.078       | (0.334)     |
| fieldworker = 3713                                    | -1.049**    | (0.162)     |
| fieldworker = 3858                                    | -0.746**    | (0.172)     |
| fieldworker = 4680                                    | -1.541**    | (0.169)     |
| fieldworker = 5681                                    | -1.192**    | (0.164)     |
| fieldworker = 6547                                    | -1.301**    | (0.163)     |
| fieldworker = 6761                                    | -1.156**    | (0.162)     |
| fieldworker = 6963                                    | -1.141**    | (0.163)     |
| fieldworker = 7683                                    | -1.295**    | (0.161)     |
| fieldworker = 8875                                    | -1.118**    | (0.161)     |
| fieldworker = 9821                                    | -0.948**    | (0.162)     |
| Intercept                                             | 2.019**     | (0.169)     |
| $\rho$                                                | 0.219       | (0.158)     |
| Significance levels :    † : 10%    * : 5%    ** : 1% |             |             |
